# Supplementary material
Source: publisher figshare collection journal article supplement (https://frontiersin.figshare.com/ndownloader/files/12784454)

Supplementary Figure 1. Complete, fragmented, and missing Benchmarking Universal Single-Copy Orthologs (BUSCOs) from the assembled *A. percula de novo* transcriptome.

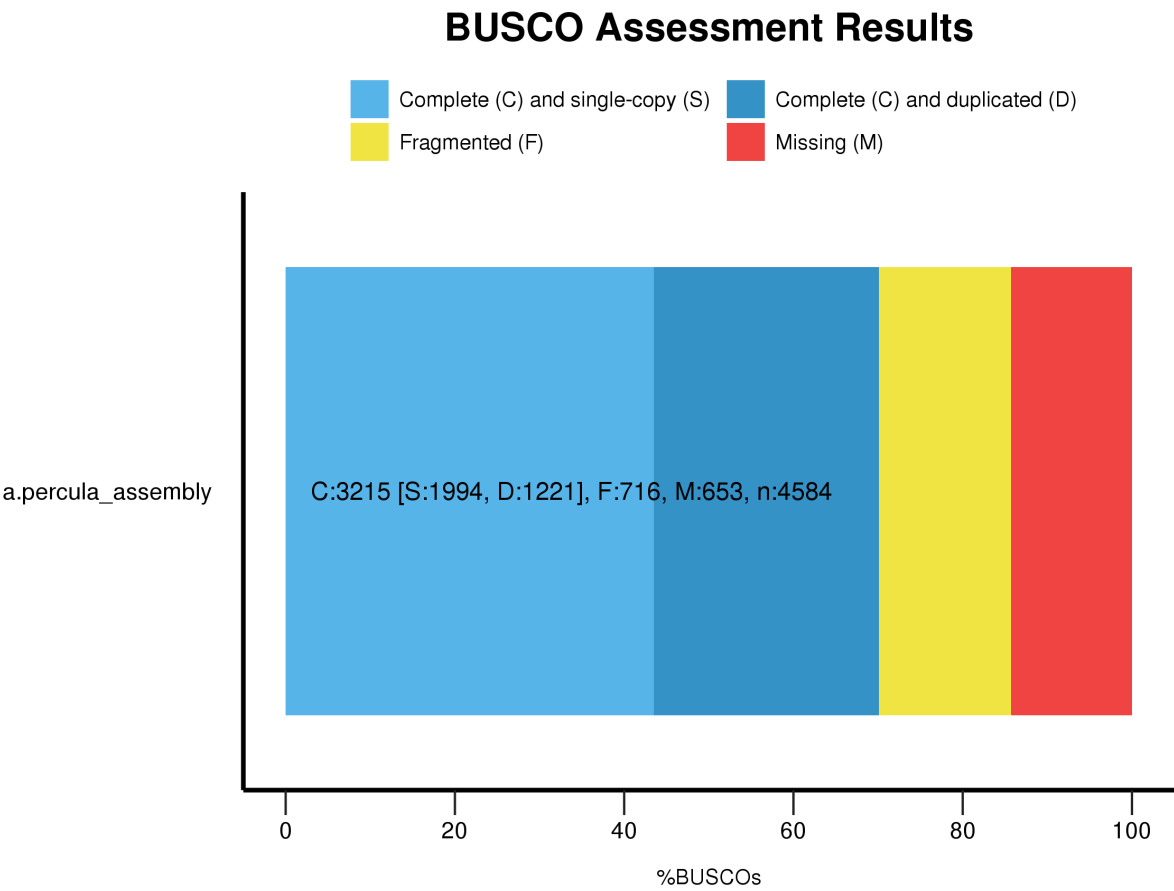

Supplement: Supplementary file 1 [file 12784454]
